# Supplementary material for: L1 Cell Adhesion Molecule-Specific Chimeric Antigen Receptor-Redirected Human T Cells Exhibit Specific and Efficient Antitumor Activity against Human Ovarian Cancer in Mice
Source: PubMed Central journal article supplement (PMC4711972; doi:10.1371/journal.pone.0146885), 2016-01-13

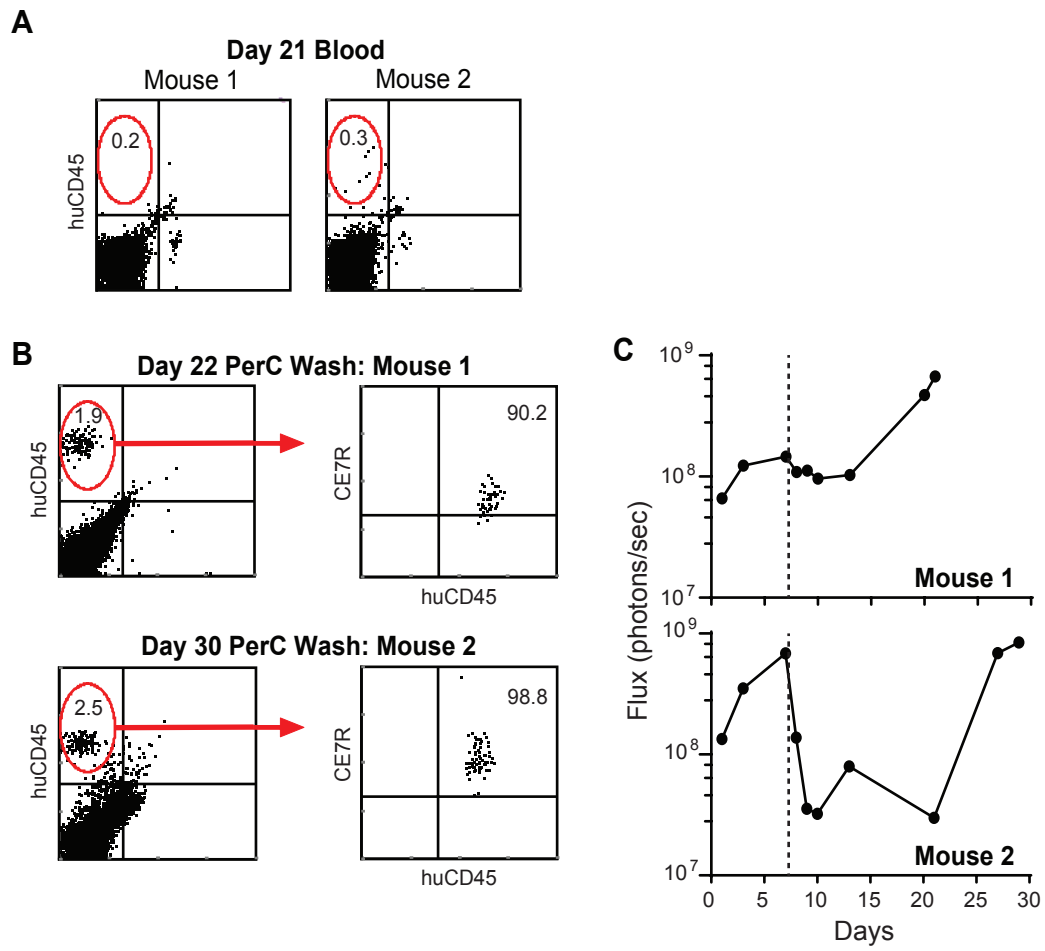

Supplement: pone.0146885.s001.pdf [file pone.0146885.s001.pdf]
